# Supplementary material for: Impaired NEPHRIN localization in kidney organoids derived from nephrotic patient iPS cells
Source: PubMed Central journal article supplement (PMC7890052; doi:10.1038/s41598-021-83501-9), 2021-02-17
Supplement: 41598_2021_83501_MOESM1_ESM.pdf [file 41598_2021_83501_MOESM1_ESM.pdf]

## Supplementary information

### **Impaired NEPHRIN localization in kidney organoids derived from nephrotic patient iPS cells**

Tomoko Ohmori<sup>1</sup>, Shankhajit De<sup>1</sup>, Shunsuke Tanigawa<sup>1</sup>, Koichiro Miike<sup>1</sup>, Mazharul Islam<sup>1</sup>, Minami Soga<sup>2</sup>, Takumi Era<sup>2</sup>, Shinichi Shiona<sup>3</sup>, Koichi Nakanishi<sup>4,5</sup>, Hitoshi Nakazato<sup>6</sup>, and Ryuichi Nishinakamura<sup>1,\*</sup>

<sup>1</sup>Department of Kidney Development, Institute of Molecular Embryology and Genetics, Kumamoto University, Kumamoto 860-0811, Japan

<sup>2</sup>Department of Cell Modulation, Institute of Molecular Embryology and Genetics, Kumamoto University, Kumamoto 860-0811, Japan

<sup>3</sup>Department of Pediatrics, Oita Prefectural Hospital, Oita 870-0855, Japan

<sup>4</sup>Department of Child Health and Welfare (Pediatrics), Graduate School of Medicine, University of the Ryukyus, Okinawa 903-0215, Japan

<sup>5</sup>Genetic Consulting Unit, University of the Ryukyus Hospital, Okinawa 903-0215, Japan

<sup>6</sup>Department of Pediatrics, Faculty of Life Sciences, Kumamoto University, Kumamoto 860-8556, Japan

## Supplementary Figure S1

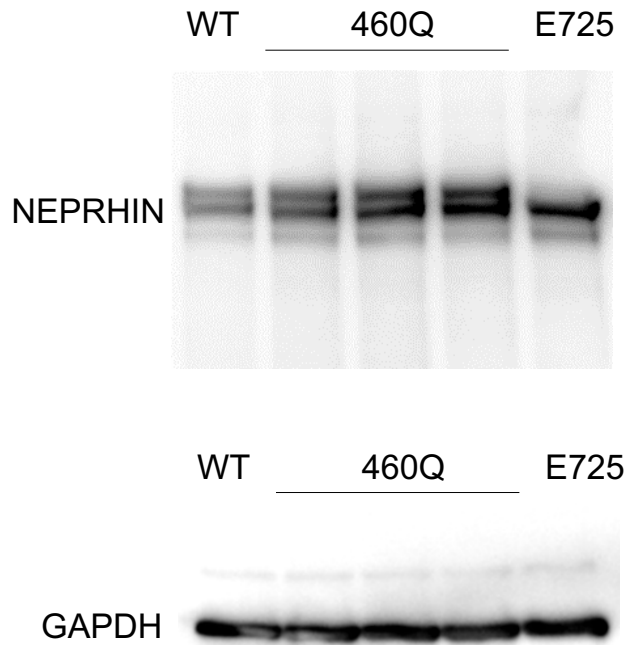

### Supplementary Figure S1

#### The full-length western blots used for Figure 2

Western blotting analysis of HEK293 cells overexpressing wild-type (WT), R460Q mutant (Patient 3), and E725D mutant (Patient 0) NEPHRIN. GAPDH is used as a loading control.

## Supplementary Figure S2

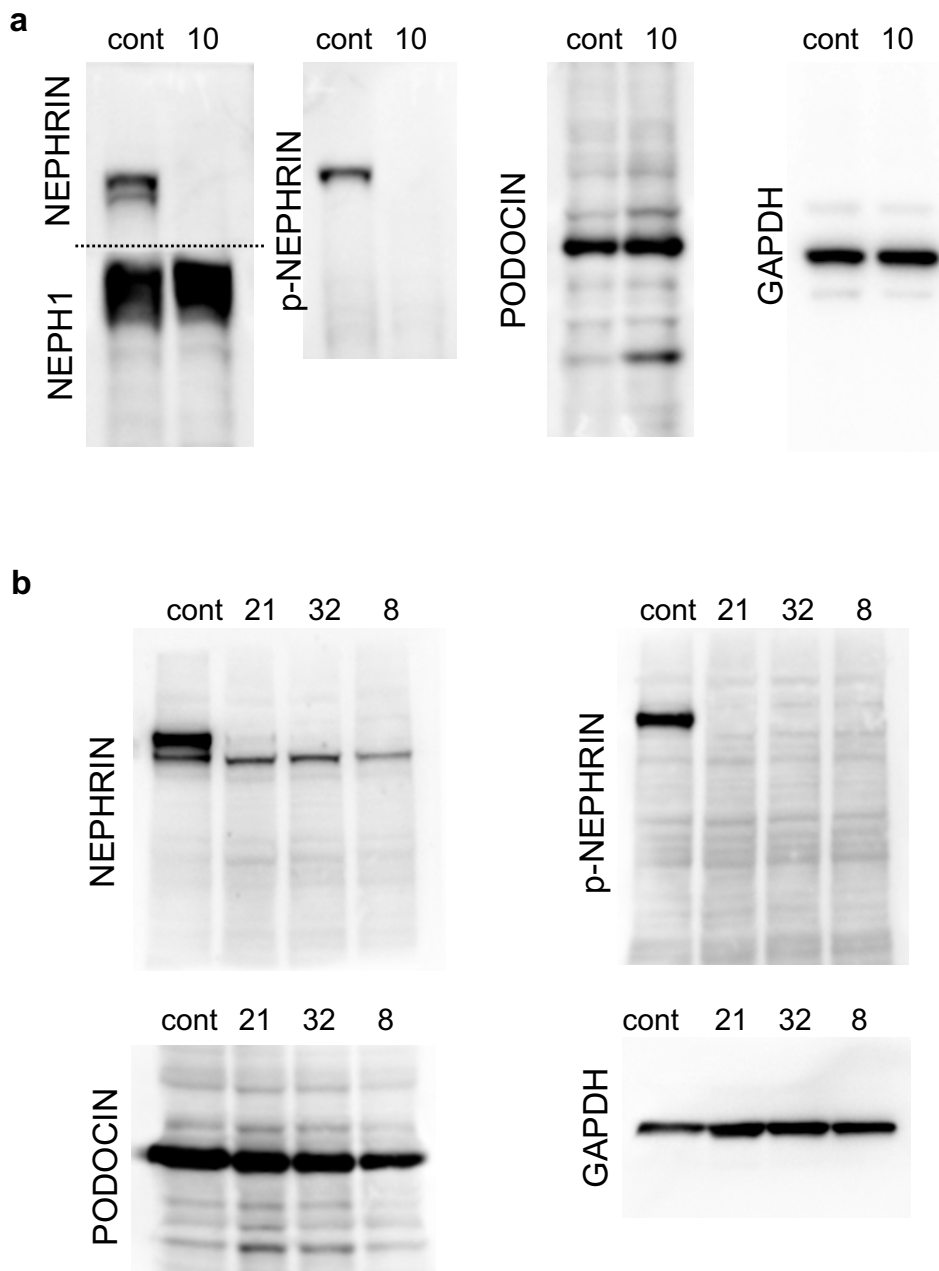

## Supplementary Figure S2

### The full-length western blots used for Figure 6

Western blot analyses of NEPHRIN, phosphorylated NEPHRIN (p-NEPHRIN), and PODOCIN in kidney organoids derived from Patient 1 (**a**) and 3 (**b**). The clone numbers are indicated at the top. GAPDH is used as a loading control. cont: control clones.

### Supplementary Figure S3

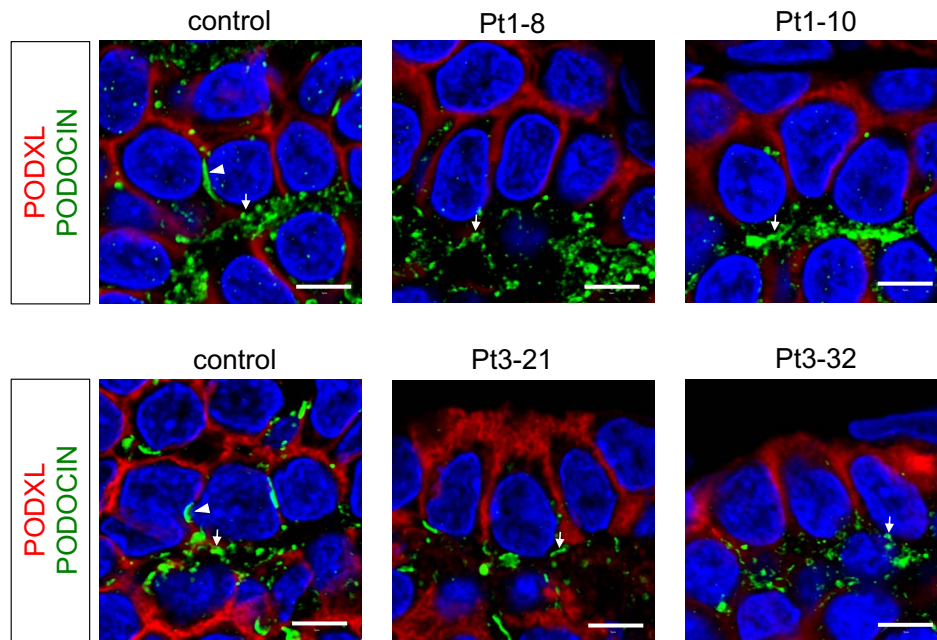

### Supplementary Figure S3

#### Localization of PODOCIN is impaired in patient-derived podocytes

Section immunostaining of kidney organoids was performed with anti-PODOCIN and anti-PODXL antibodies (upper row: Patient 1; lower row: Patient 3). PODOCIN is undetectable in the lateral domains of the podocytes derived from both patients.

Arrowheads: lateral SD precursors; arrows: basal PODOCIN+ domains. Scale bars: 5  $\mu$ m.

## Supplementary Figure S4

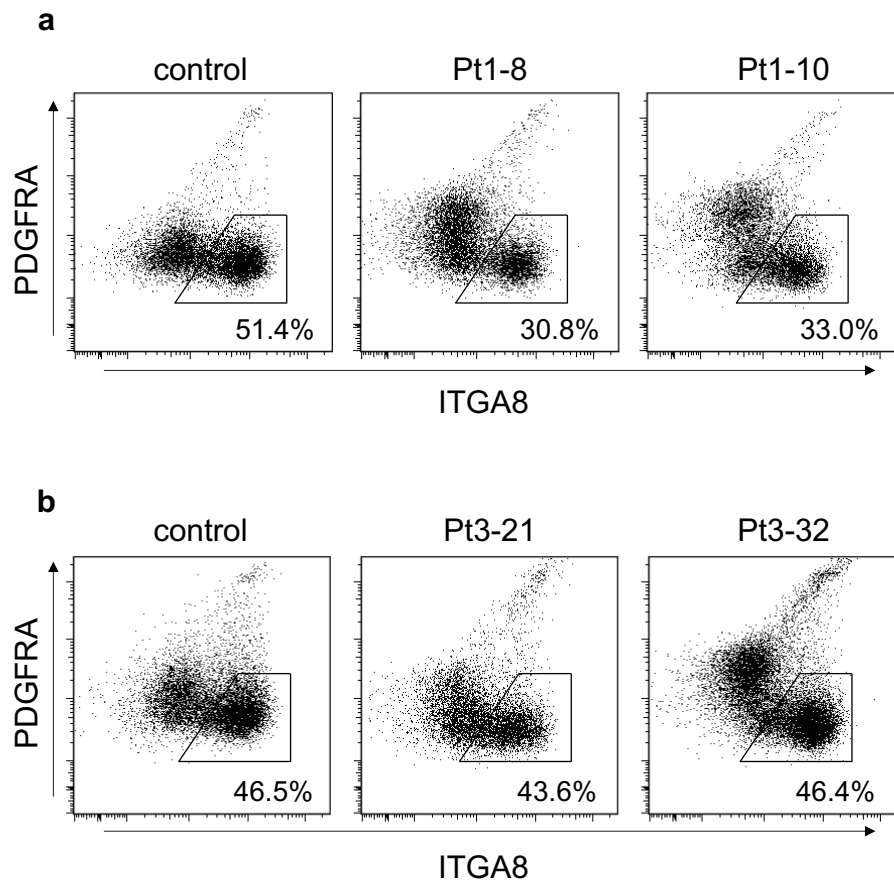

## Supplementary Figure S4

### Induction of nephron progenitors from iPSCs

Induction was performed for the control clone (201B7), two Patient 1-derived clones (Pt1-8, Pt1-10), and two Patient 3-derived clones (Pt3-21, Pt3-32), and the formation of ITGA8<sup>+</sup>/PDGFRA<sup>-</sup> nephron progenitors was analyzed by flow cytometry on day 13. Representative data are shown.
